# Supplementary material
Source: publisher figshare collection journal article supplement (https://acs.figshare.com/ndownloader/files/26769978)
Supplement: Supplementary file 1 [file 26769978]

## Supporting Information

### Metal-Free Nanoassemblies of Water-Soluble Photosensitizer and Adenosine Triphosphate for Efficient and Precise Photodynamic Cancer Therapy

Zhiliang Li,<sup>†,§,#</sup> Shukun Li,<sup>‡,§,#</sup> Yanhui Guo,<sup>\$</sup> Chengqian Yuan,<sup>‡</sup> Xuehai Yan,<sup>\*,‡,§</sup>

and Kirk S. Schanze<sup>\*,†</sup>

<sup>†</sup> Department of Chemistry, University of Texas at San Antonio, San Antonio, TX, 78249, USA

<sup>‡</sup> State Key Laboratory of Biochemical Engineering, Institute of Process Engineering, Chinese Academy of Sciences, Beijing, 100190, China

<sup>§</sup> School of Chemical Engineering, University of Chinese Academy of Sciences, Beijing, 100049, China

<sup>\$</sup> Institute of Molecular Science and Engineering, Institute of Frontier and Interdisciplinary Science, Shandong University, Qingdao, Shandong 266237, China

<sup>#</sup> The two authors contributed equally to this work.

#### 1. Loading capacity of 1-ATP

The loading capacity is the ratio of (mass of the porphyrin encapsulated in assemblies)/(mass of the assemblies)×100%. As the pKa values for ATP are 0.9, 1.5, 2.3, and 7.7, at a pH close to 7, one ATP molecule bears 3 negative charges. To ensure the charge neutrality in the assemblies, the ratio of porphyrin/ATP has to be close to 3/4. So, we calculated the loading capacity which is  $(1014 \times 3 / (1014 \times 3 + 505 \times 4)) \times 100\% = 60.1\%$ .

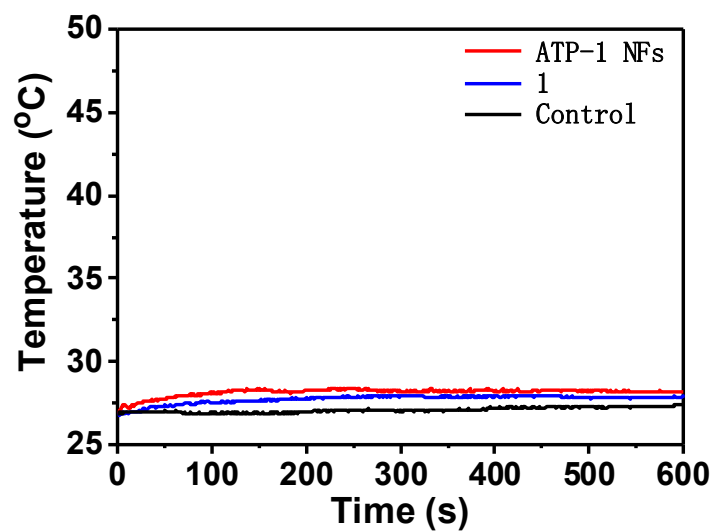

**Figure S1.** Temperatures of water, aqueous solutions of porphyrin **1** and **1**-ATP nanofibers, recorded during 10 min under laser irradiation. [**1**] = [**1**+ATP] = 20  $\mu$ M, laser power: 0.3 W  $\text{cm}^{-2}$  at 635 nm for 10 min.

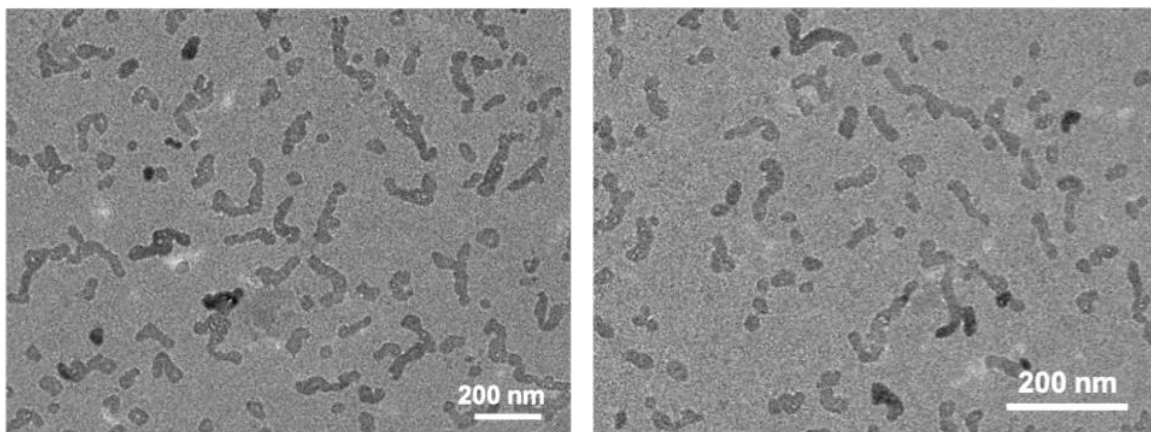

**Figure S2.** TEM images of the **1**-ATP nanofibers incubated in cell culture media for 24h.

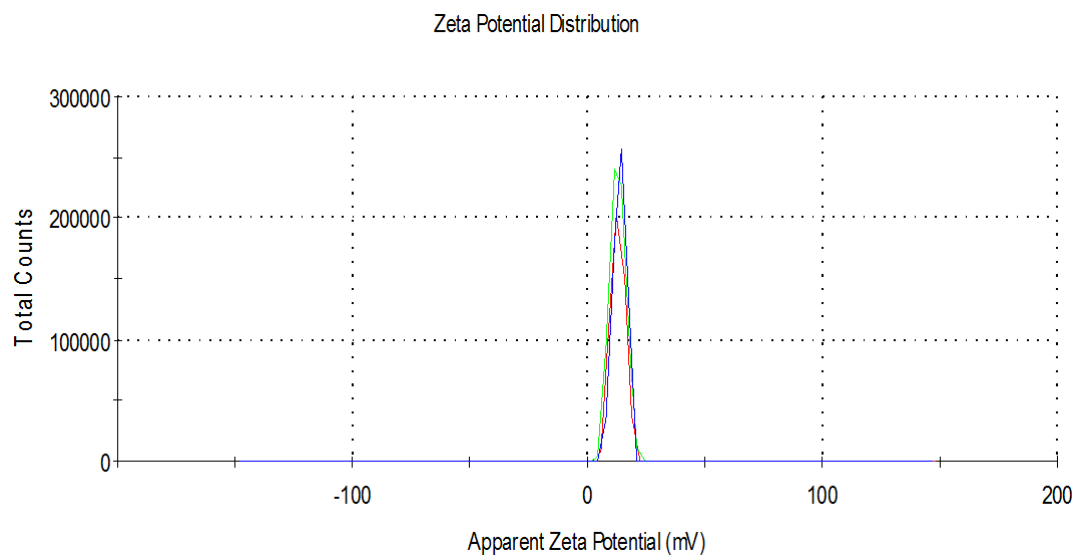

**Figure S3.** The Zeta potential distribution of 1-ATP in aqueous solution.

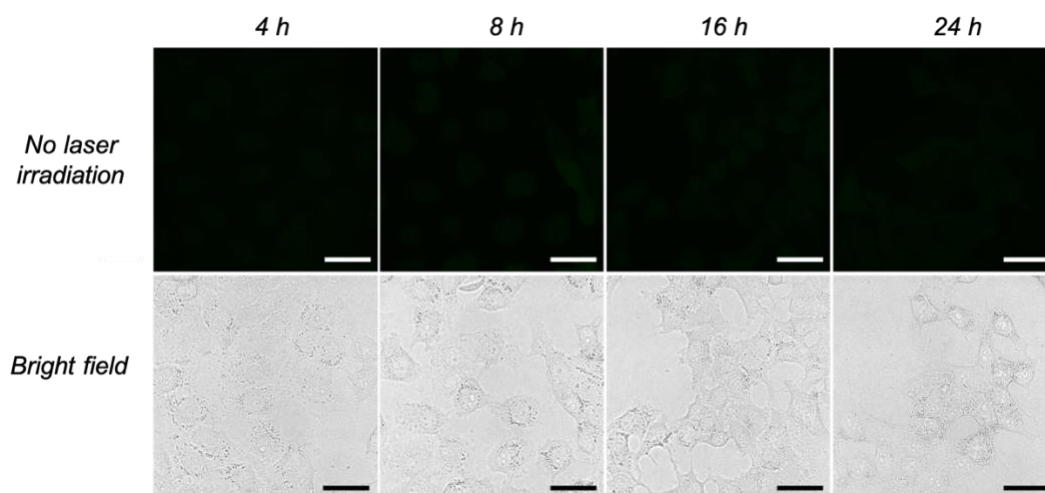

**Figure S4.** Images of MCF7 cells taken during the *in vitro* ROS generation test for nanofibers without irradiation. The MCF7 cells were incubated with the 1-ATP nanofibers for different periods of time as indicated and then with 10  $\mu$ M DCFH-DA for 0.5 h. (The concentration of 1-ATP nanofibers is 20.0  $\mu$ M in concentration of porphyrin. Scale bar: 50  $\mu$ m)

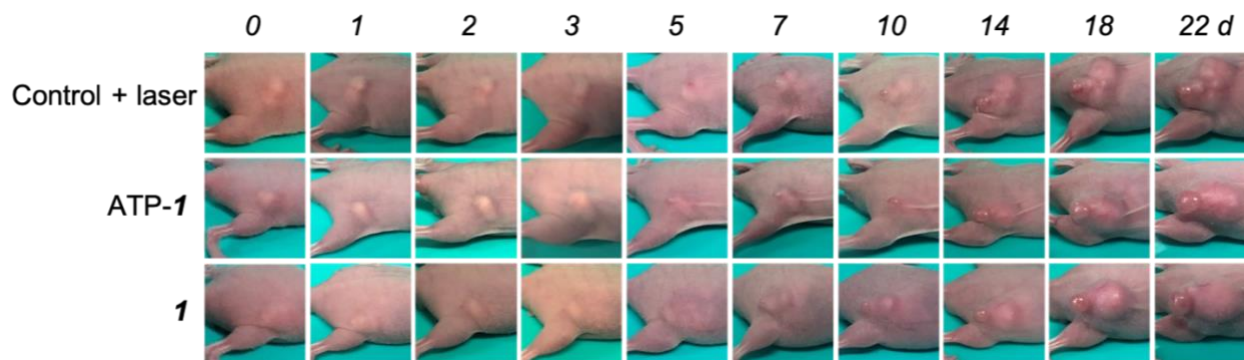

**Figure S5.** Representative photos of tumor-bearing mice at various time points of observation period. The mice were injected with aqueous solutions of **1**-ATP nanofibers, unencapsulated porphyrin **1**, or 5% glucose for the control group. At 4 h post injection, only the tumor sites in the group of “control” were irradiated by a 635 nm laser for 10 min ( $0.3 \text{ W cm}^{-2}$ ).

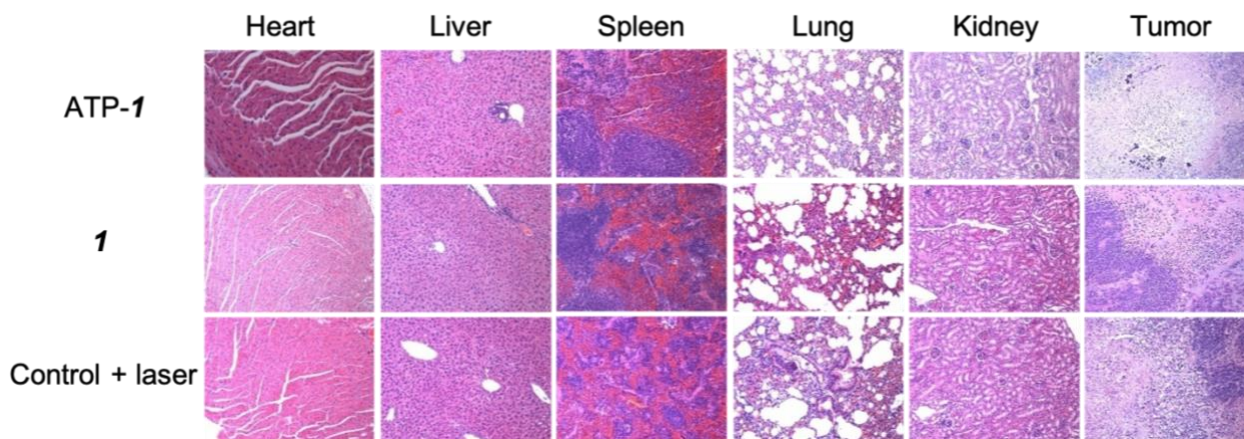

**Figure S6.** Hematoxylin and eosin (H&E)-stained histological section of heart, spleen, kidney, liver, lung and tumor tissues obtained from mice of the control groups.
